# Supplementary material for: Molecular Cloning of Dynein Heavy Chain and the Effect of Dynein Inhibition on the Testicular Function of Portunus trituberculatus
Source: MDPI journal article supplement (doi:10.3390/ani11123582), 2021-12-17
Supplement: s1 [file s1]

1 gtgacaggcgagcaggggcggaacgaacaccttgcatctactcgaactactgcatctaaccactgcatacctgc  
1 M D T G E E G D G G S G G L E T V V A V A  
76 tgaggaggaacgATGGACACCGGTGAGGAGGGTGATGGAGGCAGTGGGGGGTTGGAGACCGTGGTGGCGGTGGCG  
22 E V E A V A K H L Q R L S H V L L E E E D Q P S P  
151 GAGGTGGAGGCGGTGGCCAAACACCTGCAGCGCCTCAGTCATGTGTTGCTGGAGGAGGAGGATCAGCCATCGCCT  
47 E L V A A M K S P A V L E V T R K F V A D P Q T K  
226 GAACTGGTGGCTGCCATGAAAAGCCCTGCAGTCCTGGAGGTGACACGCAAGTTTGTGGCTGATCCTCAGACCAAG  
72 S I L I Q R S T T K E E T E E G A E V E E D K E V  
301 TCAATCCTTATTTCAGCGCAGCACCCTAAAGAGGAGACAGAAGAGGGAGCTGAAGTGGAGGAAGACAAGGAAGTG  
97 V Y H I S S G V F F T S T K M S S L L C L K R G G  
376 GTGTACCACATATCCAGTGGTGTTCCTTACCTCCACCAAGATGAGCAGCCTGCTGTGCCTCAAACGTGGTGGT  
122 V V E A D K P V S A Q I R S W S L S E G S P Y E T  
451 GTGGTGGAAGCAGACAAGCCTGTCTAGTGCACAGATTCGCTCATGGAGTCTCAGTGAAGGTTCCCTTATGAGACG  
147 L H D Y V A N A F A P Y F K A Y V K E T G K I E R  
526 CTGCATGACTATGTAGCCAATGCCTTTGCTCCGTACTTTAAGGCTTATGTGAAGGAGACTGGCAAGATTGAAAGG  
172 D G D K M A P S V E K K I A E L E M G L L H L Q Q  
601 GATGGAGATAAAATGGCACCATCAGTTGAGAAGAAGATTGCAGAGCTTGAGATGGGGCTGCTGCACTTGCAACAG  
197 N I D I P D I S L P I H P T V A Q V I K M C A D E  
676 AACATCGACATCCCAGACATCTCATTACCTATTATCCAAGTGTAGCACAGGTGATCAAGATGTGTGCAGACGAG  
222 G T R P K V A D F G D R V E D S N L L N Q L Q N G  
751 GGAACCCGGCCAAAGGTGGCTGACTTTGGGGATCGTGTGAGGACTCCAACCTCCTCAACCGCTGCAGAACGGT  
247 V A R W I R E I Q K V T K L D R D P S S G T A L Q  
826 GTGGCTCGATGGATCAGGGAGATACAGAAGGTGACCAAATGGACCGAGATCCTTCAAGTGGCACAGCCCTGCAG  
272 E I S F W L N L E R A L L K I Q D K R E S L E V A  
901 GAGATAAGCTTCTGGCTCAACCTGGAGCGTGCATTACTCAAGATTGAGGATAAAAGGGAGAGCTTGGAGGTGGCC  
297 L T L D V L K H G K R F H A T V S F D T D T G L K  
976 CTTACTCTTGATGTTCTGAAGCATGGCAAGCGCTTCCATGCCACTGTTTCTTTTGATACAGACACAGGCCTCAAA  
322 Q A L A T V N D Y A P L M K D F P L N D L L A A T  
1051 CAAGCTCTGGCCACAGTGAATGACTATGCTCCCTCATGAAGGACTTCCCACTCAATGATCTTCTGGCAGCCACG  
347 E L E K I R S A V Q A I F N H L R K I R S T K Y P  
1126 GAGCTGGAGAAGATCCGCTCTGCTGTGCAGGCCATCTTCAACCACCTGCGCAAGATCCGATCAACAAAGTACCCC  
372 I Q R A L R L V E A I S R D L S S Q I L K V L G T  
1201 ATCCAGCGTGCTCTCAGGCTGGTGGAGGCCATATCTAGGGACCTCTCCTCTCAGATCCTCAAGGTACTGGGAACA  
397 R R L M H I A F D E F E K V M S Q C F D V F V T W  
1276 CGCCGTTTGATGCATATCGCCTTTGATGAGTTTGAGAAGGTGATGAGTCAATGCTTTGATGTGTTTGTACATGG  
422 D D E Y E K L Q G L L R D I V K K K R D G Q L K M  
1351 GATGATGAATATGAAAAGCTGCAGGGACTTCTCAGAGACATAGTAAAGAAGAAGCGTGATGGACAACTTAAGATG  
447 V W R V S P A H K K L Q T R M E Q M R K F R R Q H  
1426 GTGTGGCGTGTCTCCCTGCCCATAAGAACTACAAACACGAATGGAACAAATGCGCAAGTTTCGTGCGCAGCAC  
472 E Q L R T V I V R V L R P T V V K T T T L A D G D  
1501 GAGCAGCTTCGGACTGTGATCGTGCCTGTGCTGCGGCCAACTGTTGTAAAAACCACCACGCTGGCTGATGGAGAC  
497 T A D L K R E M D A A G L N A I E E V N F A Y E N  
1576 ACAGCTGACCTCAAGCGTGAGATGGATGCTGCAGGTCTCAATGCCATTGAAGAGGTGAACCTTGCCTATGAAAAAT  
522 V K E V D G L D T S K E G T D M W E A A L K R Y D

1651 GTGAAGGAGGTGGATGGCCTGGACACCAGCAAAGAGGGCACTGACATGTGGGAAGCTGCTCTCAAACGTTATGAT  
547 E R I D R V E T R I T A R L R D Q L G T A K N A N  
1726 GAGAGGATTGATCGTGTGGAGACACGCATCACAGCTCGACTCAGGGATCAGCTGGGCACTGCCAAAAATGCCAAC  
572 E M F R I F S R F N A L F V R P H I R G A I R E Y  
1801 GAGATGTTTCGTATTTTCTCTCGCTTCAATGCCTTGTGTTGTGCGCCCCACATCCGTGGTGCCATCCGAGAGTAT  
597 Q T Q L I Q R V K D D I E S L H E K F K V R Y P Q  
1876 CAGACACAGCTAATTCAAAGAGTCAAGGATGACATTGAGAGCCTTCATGAGAAATTCAAGGTCCGGTATCCCCAA  
622 S K C C R M S T V R D L P P V S G S I I W A K Q I  
1951 AGCAAGTGTGTCCGCATGAGCACGGTGAGGACCTGCCGCTGTTTCTGGCTCCATTATCTGGGCCAAGCAGATT  
647 D R Q L T A Y M R R V E D V L G K G W E S H V E G  
2026 GACCGGCAGCTGACAGCATACATGCGGCGTGTGGAAGATGTGCTTGGCAAAGGTTGGGAGAGCCATGTGGAGGGC  
672 Q K L K G D G D S F R L K L N T Q D I F D D W A R  
2101 CAGAAGCTGAAGGGTGATGGAGACTCATTCAAGCTCAAGCTCAATACCCAAGATATTTTGTGATGTGGGCCAGG  
697 K V Q Q R N L G V S G R I F A I E T H R S K T G K  
2176 AAGGTTCAAGGAGAACTTGGGTGTATCTGGCCGCATCTTGGCATTGAGACGCACCGCTCCAAGACAGGCAAA  
722 G N E C K L K V N F L P E T I T L S K E V R N L K  
2251 GGCAATGAGTGCAAGCTGAAAGTCAACTTCTTGCCAGAGACCATCACTTTGTCCAAGGAAGTGCGGAATTTGAAG  
747 N L G F R V P L T I V N K A H Q A N Q L Y P F A I  
2326 AACCTTGGCTTCAGGGTACCACTGACCATTGTTAACAAGGCTCATCAGGCCAACCAGCTGTACCCATTGTGCTATT  
772 S L I E S V R T Y E R T L E K M E D K T N I L L L  
2401 TCTCTCATAGAGAGTGTGCGCACCTATGAACGAACCTGGAGAAGATGGAAGACAAGACTAACATCTTGTGCTT  
797 V A G M R K E V Q G L V S E G M S L V W E S Y K L  
2476 GTGGCAGGCATGCGTAAAGAAGTGCAAGGACTTGTGTCTGAGGGCATGTGCTGCTGGTGTGGGAGTCGTACAAATTG  
822 D P Y V Q R L A E C V F N F Q E K V D D S L V L E  
2551 GACCTTATGTACAAACGGCTGGCAGAATGTGTCTTCAACTCCAAGAGAAGGTTGATGACTCGTGGTACTTGAG  
847 E Q L D V D V R S L D T C Q Y A H F T F A E I L N  
2626 GAACAACTGGACGTGGATGTGCGGTCAATTGGACACTTGTGAGTATGCCATTTACCTTTGCCGAGATCCTCAAC  
872 K I Q K A V D D L S L H Q Y S N L H I W V Q R L D  
2701 AAGATCCAGAAAGCTGTGGATGACCTCTCTCTCCACAGTACTCCAATCTACACATCTGGGTACAGAGGCTGGAT  
897 E Q V E K K L A A R L Q A G L Q A W T A A L L G Q  
2776 GAACAGGTTGAGAAGAAGCTTGACGACGCTTTCAGGCCGCTCCAGGCATGGACAGCAGCTCTTCTAGGACAG  
922 Q Q K D E D I D I P M D T D T P D K P T H K P G G  
2851 CAGCAGAAGGATGAGGATATTGACATTCTATGGACACTGATACTCTGATAAAACCAACACACAAGCTGGTGGA  
947 A P K I N Q V V Q E V R I T N Q T M Y M H P A I E  
2926 GCTCAAAGATCAACCAGGTGGTGCAAGAGGTGCGCATCACCAACCAGACCATGTACATGCCCCAGCCATAGAG  
972 Q A R Y Q I M E Q L F G W Q A I V T S Q N R I Q S  
3001 CAGGCACGCTACCAGATCATGGAGCAACTCTCGGCTGGCAGGCCATTGTACCTCACAGAACCGCATCCAGAGC  
997 T R Y Q V G L D R P T T Q V Y K N L L T K L P E R  
3076 ACCCGATACCAGGTTGGACTGGACCGACCCACCACCAAGTCTATAAAAAATCTGCTCACCAAGCTCCCTGAGAGG  
1022 H T Y I K A A Y K A I E M V V D E V T T Y V Q E W  
3151 CACACCTACATCAAGGCTGCTTACAAGGCAATTGAGATGGTAGTGATGAAGTGACCACTTATGTCCAAGAGTGG  
1047 L Q Y Q A L W D L Q P D H L Y G Q L G D D V A K W  
3226 CTGCAGTATCAAGCTCTGTGGGATTGACAGCCAGATCATCTTTATGGCCAGCTGGGTGATGATGTGGCCAAGTGG  
1072 M K L L Q D I K Q C R T T F D T S D T R R G F G P

3301 ATGAAGCTTCTACAGGACATCAAACAGTGCCGCACCACATTTGACACCTCAGACACTCGGGCGGGCTTTGGACCC  
1097 I V V D Y A K V Q S K V S L K Y D S W H K D V L S  
3376 ATTGTTGTGGACTATGCCAAGGTGCAGAGCAAAGTGTCCCTCAAGTATGACTCGTGGCACAAGGATGTCCTCAGC  
1122 K F G Q L L G Q E M T Q F H A Q V S K S R S E L E  
3451 AAGTTTGGACAGCTGCTGGGTCAGGAGATGACACAGTTCCATGCTCAGGTGTCAAAGAGCCGAAGTGAGCTGGAG  
1147 Q Q S I D A A S T S D A V T L I T Y V Q A L K R K  
3526 CAGCAGAGCATTGATGCGGCCAGCACCTCTGATGCTGTGACCCTCATCACTTATGTACAAGCTCTTAAACGCAAG  
1172 M K S W E K H V E M Y K E G Q R I L E R Q R F Q F  
3601 ATGAAATCATGGGAGAAGCATGTTGAAATGTACAAGGAGGACAACGGATCTTGAGCGGCAACGCTTCCAGTTT  
1197 P N Q W L H V D N I E G E W G A F N E I I R R K D  
3676 CCTAACCAATGGTTGCATGTGGACAACATTGAGGGTGAATGGGGAGCCTTCAACGAGATCATCCGCCGCAAAGAT  
1222 S S I Q T Q V A S L Q L K I V A E D K A V E S R T  
3751 TCAAGCATCCAGACCCAGGTGGCCTCCCTGCAACTTAAGATTGTAGCAGAGGACAAGGCTGTAGAGTCCCGCACC  
1247 N D F L Q D W E H G K P V E G H L R P D E A L Q R  
3826 AATGACTTCCTGCAGGACTGGGAGCATGGCAAGCCAGTGAAGGACACCTGCGACCAGATGAGGCATTGCAGCGC  
1272 L T L Y E S K F T R L K D D R D N V A K A K E A L  
3901 CTTACCTGTATGAAAGCAAGTTACCCGCTCTCAAGGATGACCGAGACAATGTGGCCAAGGCCAAGGAAGCTTTG  
1297 E L Q E P G A L N T S E D R M T V A Y E E L Q D L  
3976 GAGCTCCAGGAGCCTGGAGCCCTCAACACATCAGAAGACAGAATGACAGTGGCCTATGAAGAGCTGCAGGACCTG  
1322 K G V W A E L A K I W E Q I D E M K E K P W L S V  
4051 AAGGGAGTGTGGGCTGAGCTGGCCAAGATCTGGGAGCAGATTGATGAGATGAAGGAGAAGCCTTGGCTCTCAGTG  
1347 Q P R K L R G Q L D Q L L T Q L K D L P A R L R Q  
4126 CAACCCAGAAAACCTACGTGGCCAGCTAGATCAGCTGTTGACTCAATTGAAGGACTTGCCAGCCCGCCTGCGTCAG  
1372 H A S Y E Y V K R L L Q G Y T K V N M T I I E L K  
4201 CATGCAAGCTATGAGTATGTGAAACGGCTGCTGCAGGGCTACACCAAGGTGAACATGACCATTATTGAACTGAAG  
1397 S D A L K E R H W K T L M K Q L H V S W L L S D L  
4276 AGTGACGCCCTCAAGGAGCGCCACTGGAAGACCCTAATGAAGCAGCTGCATGTCTCCTGGTTGTTGAGTGATTTG  
1422 T L G Q V W D V D L V K N E A I I K N V I I T A Q  
4351 ACCTTGGGGCAGGTGTGGGATGTGGACCTGGTGAAGAATGAGGCCATTATCAAGAATGTGATCATTACTGCCAG  
1447 G E M A L E E F L K Q V R E S W Q C Y E L D L I N  
4426 GGTGAGATGGCCCTGGAAGAGTTCTGGAAGCAGGTGAGGGAGTCTTGGCAGTGTTATGAGCTGGATCTTATCAAC  
1472 Y Q N K C K L I R G W D D L F N K V K E H I N S V  
4501 TACCAGAACAAGTGCAAGCTGATCCGTGGCTGGGATGATCTCTTCAACAAGGTGAAGGAGCACATCAACTCAGTG  
1497 A A M K L S P Y Y R E F E E E A L T W E E K L N R  
4576 GCTGCTATGAAACTGTCTCCCTACTACAGGAGTTTGAAGAGGAGGCACTCACCTGGGAAGAGAACTGAACAGG  
1522 I N S L F D V W I D V Q R R W V Y L E G I F S G S  
4651 ATTAACCTCCTCTTTGATGTATGGATTGACGTGCAGAGGCGCTGGGTCTACTTGGAGGGGATCTTCTCTGGGTCC  
1547 S D I K A L L P V E T S R F S S I S T E F L N L M  
4726 TCCGACATCAAGGCTCTGCTGCCTGTGGAGACCTCACGCTTCAGCAGCATTAGTACTGAATTCTTGAACCTGATG  
1572 K K V S K S P M V M D V L N I Q G V Q R S L E R L  
4801 AAGAAGGTGAGCAAATCACCGATGGTGATGGATGTACTCAACATTGAGGGTGTCCAGCGATCCCTGGAGCGCCTG  
1597 A D L L G K I Q K A L G E Y L E R E R S S F P R F  
4876 GCTGATCTGTGGGCAAAATACAGAAGGCCCTTGGCGAGTACTTGGAGCGAGAGAGATCTTCTTCCCCAGATTG  
1622 Y F V G D E D L L G I I G N S K N I P R L Q K H F

4951 TATTTTGTGGGAGATGAGGACTTGCTGGGGATTATTGGCAATAGCAAGAACATTCTCGGCTTCAGAAACACTTC  
1647 K K M F A G V T A I N L D E T E T V V T G I A S R  
5026 AAGAAGATGTTTGTGGGGTGACTGCTATCAATCTGGATGAGACAGAGACTGTAGTCACTGGGATTGCCTCCAGG  
1672 E G E E V P F N K V V S T V D F P K I N E W L A Q  
5101 GAGGGAGAAGAGGTACCATTCAACAAAGTGGTATCAACAGTGGAAGTCTCCCAAGATCAATGAATGGCTGGCCCAG  
1697 V E K E M R V T L A Q N L A A A V G E I K Q F K H  
5176 GTAGAGAAGGAGATGAGGGTGACACTGGCTCAGAACTTGGCAGCTGCAGTGGGAGAGATCAAGCAATTCAAGCAT  
1722 G P I D T A S Y L A W C D K Y Q A Q L V V L A A Q  
5251 GGCCCCATTGACACAGCCAGCTACTTAGCCTGGTGTGACAAGTACCAAGCCAGCTGGTTGTGCTGGCTGCCAG  
1747 I S W S E E V E A G L V A A S N G D S G P L D Q T  
5326 ATTTTCATGGAGTGAAGAGGTGAAGCTGGCCTGGTAGCAGCATCTAATGGAGACTCTGGACCGCTGGATCAGACC  
1772 L V Q V E A T L N V L A D S V L Q E Q P L L R R K  
5401 TTGGTTCAGGTGGAGGCCACTCTTAATGTGTTGGCTGACTCAGTCCTACAGGAGCAACCTCTCTTGGCGCGCAA  
1797 K L E H L I S G F V H K R T V T R N L I K N K I T  
5476 AAGCTGGAACACCTGATCAGTGGGTTTGTCCACAAGAGGACAGTGACCAGAAACCTAATCAAGAACAAGATAACC  
1822 N P K S F D W L S Q M R F Y F D P K Q S D P L K Q  
5551 AACCTAAGTCCTTTGATTGGTTGAGCCAAATGAGATTCTACTTTGACCCAAAGCAGAGTGATCCCTGAAGCAG  
1847 L S I H M A N A K F N Y G F E Y L G V Q D K L V Q  
5626 CTCAGCATCCACATGGCCAATGCCAAGTTTAACTATGGCTTTGAGTACCTTGGCGTACAGGACAAGCTGGTACAG  
1872 T P L T D R S Y L T M T Q A L E A R L G G S P F G  
5701 ACACCTCTCACTGACCGCAGCTACCTCACCATGACACAGGCGCTGGAGGCTCGTCTTGGAGGCTCACCGTTTGGT  
1897 P A G T G K T E S V K A L G N Q L G R F V L V F N  
5776 CCAGCTGGTACTGGCAAGACTGAGTCTGTCAAGGCTCTGGGCAACCAGCTGGGTCGCTTTGTGCTTGTGTTCAAC  
1922 C D E T F D F Q A M G R I F V G L C Q V G A W G C  
5851 TGTGATGAGACCTTTGACTTCCAGGCCATGGGCAGAAATTTTGTGGTCTTTGCCAGGTAGGGGCATGGGGATGC  
1947 F D E F N R L E E R M L S A V S Q Q I Q T I Q E A  
5926 TTTGACGAGTTCAACCGTCTGGAGGAGAGAATGCTGTGCGCTGTGTCCAGCAGATCCAGACCATCCAGGAGGCC  
1972 L K E K A G T N S N T S V G Q V L T V E L V G K Q  
6001 CTCAAGGAGAAGGCTGGCACCAACAGCAACACGAGTGTGGTTCAGGTGTTGACCGTGAGCTGGTGGGCAAGCAA  
1997 V K V S T D M A I F I T M N P G Y A G R S N L P D  
6076 GTGAAGGTATCCACTGACATGGCCATCTTCATCACCATGAACCTTGATATGCTGGCCGTTCTAATCTCCAGAT  
2022 N L K K L F R S L A M T K P D R Q L I A E V M L F  
6151 AACCTTAAGAAGCTGTTCCGCTCCCTGGCTATGACTAAGCCTGACCGACAGCTCATTGCAGAGGTATGCTGTTCC  
2047 S Q G F R S A E K L A S K I V P F S K L C D E Q L  
6226 AGTCAAGGCTTCAGATCAGCTGAGAAGCTAGCCAGCAAAATTGTTCCATTCTCCAACTTTGTGATGAGCAGCTG  
2072 S N Q S R Y D F G L R A L K S V L V S A G N V K R  
6301 TCCAACCAGTCCCGCTATGACTTTGGTCTGCGTGCCCTCAAGTCAGTGTGGTGTCTGCTGGCAATGTGAAGCGT  
2097 D R I Q R I K E D L R S R E E A V I D E G T I A E  
6376 GATCGCATTGACGCATCAAGGAGGACCTCAGGAGCAGGGAGGAGGCAGTCATTGATGAGGGCACTATTGCAGAG  
2122 N L P E Q E I L I Q S V C E T M V P K L V A E D I  
6451 AATCTTCCAGAGCAGGAGATCCTGATTGAGTGTATGTGAGACAATGGTGCCCAAGCTCGTGGCAGAGGACATC  
2147 P L L F S L L S D V F P G I E Y T R A Q M S G L K  
6526 CCCCTGTTGTTCTCCCTACTGTCTGATGTGTTCCAGGCATTGAGTACACACGTGCCAGATGTCTGGCCTTAA  
2172 E E I R K V C R E Q L L V C G E G E E Q G A H W M

6601 GAAGAGATCAGGAAGGTGTGCAGGGAGCAGCTCCTGGTGTGTGGTGAGGGGGAGGAGCAGGGGGCAGACTGGATG  
2197 E K V L Q P Y Q I S N L N H G L M M V G P S G S G  
6676 GAGAAGGTGCTCCAGCCGTACCAGATCAGCAACCTTAACCATGGTCTTATGATGGTGGGGCCCAGTGGCTCAGGC  
2222 K S T A W R V L L K A L E R F E G V E G V A H V I  
6751 AAGTCAACAGCCTGGCGTGTGCTGCTGAAGGCCCTGGAGCGCTTTGAGGGAGTGGAGGGTGTGGCACATGTCATT  
2247 D P K A M S K E A L Y G V L D P N T R E W T D G L  
6826 GACCCAAGGCCATGAGCAAGGAAGCACTTTATGGTGTGCTGGACCCAACACCCGGGAGTGGACTGACGGCCTC  
2272 F T H I L R K I I D N V R G E I N K R Q G I I F D  
6901 TTCACACACATCCTCAGGAAGATCATTGACAATGTTCGTGGAGAAATCAATAAACGGCAGGGGATTATCTTTGAT  
2297 G D V D P E W V E N L N S V L D D N K L L T L P N  
6976 GGAGATGTGGATCCTGAGTGGGTGGAGAACCTTAAGTCACTGCTGGATGACAACAAGCTACTCACGCTGCCCAAT  
2322 G E R L S I P P N V R I M F E V Q D L K Y A T L A  
7051 GGCGAGCGTCTCTCTATCCCGCCAAATGTCCGGATCATGTTTGAGGTGCAAGACCTGAAGTATGCCACTCTGGCT  
2347 T V S R C G M V W F Y E D V L S V E M I F E N Y L  
7126 ACTGTGTCTCGCTGTGGTATGGTATGGTTCTATGAGGATGTGCTGTCTGTGGAGATGATCTTTGAGAACTACCTG  
2372 S R L S N I P V E E T E E D I A F I K K T D K K T  
7201 TCCCGCTGTCTAACATCCCGGTGGAGGAGACTGAAGAAGACATTGCTTTTCATCAAGAAAACAGACAAGAAGACT  
2397 D D E I T P H C S A E R C G F H P V T T S H P R W  
7276 GATGATGAGATTACCCACACTGCAGTGCAGAGAGATGCGGCTTCCATCCTGTCACCACATCTCACCCAGATGG  
2422 P C V K C L E Y A T N N L E H I M D F T R M R A L  
7351 CCTTGTGTGAAGTGCTTGAATATGCCACCAACAACCTTGAACACATCATGGACTTCACCCGTATGAGGGCACTC  
2447 S S L F A L L N Q A V R N I V Q Y N N T H P D F P  
7426 TCATCCCTCTTTGCCCTCCTCAACCAGGCTGTGAGGAATATTGTGCAGTACAACAATACCCACCCTGACTTCCCC  
2472 M H T D Q L E R Y V P K A L V H S L L W S F A E D  
7501 ATGCACACAGATCAGCTGGAGAGGTATGTCCCTAAGGCACCTGGTGCACCTCATTGTTGTGGAGCTTTGCTGAGGAT  
2497 G K L K A R S D M G D F I R N S T T I P L P P N T  
7576 GGCAAGCTGAAGGCTCGCAGTGACATGGGCGACTTCATCCGTAAGTCCACCACCATCCCACTGCCACCAAACACC  
2522 S N P I I D Y E V S I S G E W M L W S A K V P S M  
7651 AGTAATCCAATCATTGACTATGAGGTGTCCATCAGTGGAGAGTGGATGTTGTGGTGTGAGCCAGGTGCCAGCATG  
2547 E V E T H K V A T P D V V V P T V D T V R H E A L  
7726 GAGGTGGAGACTCACAAAGTGGCAACACCTGATGTAGTGGTGGCCACCGTGGACACAGTGCGCCATGAGGCTCTC  
2572 L Y T W L A E H K P L V L C G P P G S G K T M T L  
7801 CTCTACACCTGGCTAGCTGAACACAAACCTCTTGTGCTGTGTGGCCACCTGGCTCAGGCAAGACTATGACCTTG  
2597 F S A L R A L P D L E V V G L N F S S A T T P E L  
7876 TTCTCTGCCCTGCGAGCCCTGCCAGATTTGGAAGTGGTGGGCCTTAACTTCTCCAGTGCTACCACACCAGAGCTC  
2622 L L K T F D H Y C E Y R K T P N G I I L S P V Q L  
7951 CTGCTGAAGACCTTTGACCACTACTGCGAGTACCGTAAGACTCCCAATGGCATTATCCTGTCCCCTGTGCAGCTG  
2647 G K W L V V F C D E I N L P D M D K Y G T Q R V I  
8026 GGCAAGTGGCTGGTGGTATTCTGTGACGAGATCAACTTGCCGGATATGGACAAGTACGGCACTCAGCGTGTGCATC  
2672 S F L R Q M V E H G G F F R I S D Q A W V K L E R  
8101 AGCTTCCTTCGGCAGATGGTGGAGCACGGTGGCTTCTTCAGGATCTCAGACCAAGCATGGGTGAAGCTGGAACGC  
2697 I Q F V G A C N P P T D P G R K P L S H R F L R H  
8176 ATCCAGTTTGTGGGTGCCTGTAATCCTCCAAGTATCCTGGCCGAAAGCCCTCTCCACCGGTTCTGCGCCAT  
2722 V P V V Y V D Y P G E T S L K Q T Y G S F N R A M

8251 GTACCAGTGGTGTATGTGGACTACCCTGGAGAGACATCCCTAAAGCAGACCTATGGTTCCTTCAACAGGGCCATG  
2747 L R I I P P L R S Y A D P L T N A M V E F Y L Q S  
8326 CTCAGGATCATTCCTCCTCTCAGATCATATGCAGACCCACTGACCAATGCCATGGTGGAGTTCTACCTCCAATCT  
2772 Q E R F T Q D M Q P H Y V Y S P R E M T R W V R G  
8401 CAGGAGCGCTTCACACAGGACATGCAGCCGCACTATGTGTACTCTCCACGTGAAATGACGAGATGGGTGCGAGGC  
2797 I C E A I R P L E T L D V E G L V R L W A H E A L  
8476 ATCTGTGAGGCCATCAGGCCATTGGAAACCTGGATGTTGAGGGACTGGTCAGACTATGGGCCCATGAGGCTCTC  
2822 R L F H D R L V T D E E R K W T N D N V D A I A L  
8551 CGGCTTTTCCATGACCGTCTGGTAACAGATGAGGAGCGCAAGTGGACCAATGACAATGTGGATGCTATTGCTCTC  
2847 K H F P N T D R D R A L H R P I L Y S N W L S K D  
8626 AAGCACTTCCCCAACACTGATCGAGACAGAGCTCTGCACCGACCCATCTTGTACTCAAAGTGGCTGTCCAAGGAC  
2872 Y L P V D Q E E L R E Y V K A R L K V F Y E E E L  
8701 TATCTTCCAGTAGACCAGGAGAGCTGAGGGAATATGTTAAGGCCAGGCTGAAGGTGTTCTACGAGGAGGAGCTA  
2897 D V P L V L F N E V L D H V L R I D R I F R Q P Q  
8776 GATGTGCCCTGGTGTGTTTAAACGAGGTGCTTGACCACGTGCTGCGTATTGACCGTATCTTCCGGCAGCCTCAG  
2922 G H L L L I G A S G A G K T T L S R F V A W M N G  
8851 GGTCACTTGCTGCTTATTGGAGCCTCAGGGCTGGCAAGACCACCTTGTCACGCTTTGTGGCTTGGATGAATGGC  
2947 L S I F Q I K V H N K Y T S E D F D E D L R A V L  
8926 CTCTCCATCTTCCAGATCAAAGTGCACAACAAATACACTTCAGAAGACTTCGATGAGGACCTGCGAGCAGTGCTC  
2972 R R S G C K D E K I C F I L D E S N V L D S S F L  
9001 CGGCGCTCAGGCTGCAAGGATGAGAAAATATGCTTCATTTGGATGAGTCCAATGTGTTGGATTCTCTCTTCTTG  
2997 E R M N T L L A N G E V P G L F E G D E Y T T L M  
9076 GAACGCATGAACACCCTGCTGGCCAACGGTGAGGTGCCAGGTCTGTTTGAGGGTGACGAGTACACTACCCTCATG  
3022 T Q C K E G S Q R E G L M L D S S E E L Y K W F T  
9151 ACCCAGTGCAAAGAAGGCAGCCAGCGTGAAGGGCTCATGTTGGATTCCAGTGAGGAGCTGTACAAGTGGTTCACT  
3047 G Q V I R N L H V V F T M N P S A D G L K D R A A  
9226 GGCCAGGTTATAAGGAACCTTCATGTGGTGTTCACCATGAATCCCTCTGCTGATGGTCTCAAGGACCGTGCTGCA  
3072 T S P A L F N R C V L N W F G D W S N G A L F Q V  
9301 ACCTCCCCTGCCTTGTTCAACAGGTGTGTCTCAACTGGTTTGGAGACTGGTCCAATGGTGCCTGTTCCAGGTA  
3097 G M E F T H R I D L D R M N W A A P D Y F P V A Y  
9376 GGAATGGAGTTCACGCACCGCATTGATCTGGACAGAATGAACTGGGCAGCCCCAGACTACTTCCCAGTAGCTTAT  
3122 E C L P A P P S H R D A I I N A F V H V H Q T L H  
9451 GAGTGCCTGCCTGCGCCGCTAGCCACAGGGATGCCATCATCAATGCCTTTGTACATGTGCATCAGACTCTGCAC  
3147 R A N T R L A K R G S T V M A I T P R H Y L D F I  
9526 CGAGCCAACACTCGTCTGGCCAAGAGAGGCAGCACTGTTATGGCCATCACTCCAAGACACTACCTGGACTTCATC  
3172 D H F V K L Y N E K R S E L E E Q Q L H L N V G L  
9601 GATCACTTTGTGAAGCTGTACAATGAAAAACGATCAGAGCTTGAGGAGCAGCAACTCCATCTGAATGTAGGTCTG  
3197 G K I A E T V E Q V E Q M Q K S L A I K N Q E L Q  
9676 GGCAAGATTGCCGAAACAGTGGAGCAGGTGGAACAGATGCAGAAATCCTTGGCCATCAAAAACCAGGAGCTGCAA  
3222 A K N E A A N L K L K Q M V K D Q Q E A E K Q K V  
9751 GCCAAGAATGAAGCAGCCAATCTTAAGCTGAAACAGATGGTGAAGGATCAACAAGAGGCTGAGAAGCAGAAGGTT  
3247 A S Q E L Q E Q L E A Q T V R I T I K R E E V M Q  
9826 GCCAGTCAAGAGCTGCAGGAGCAGCTAGAAGCTCAAAGTGTACGTATCACAATCAAGCGAGAGGAGGTGATGCAG  
3272 D L S K V E P A V Q D A Q N A V K S I K E Q H L V

9901 GATCTGAGCAAAGTAGAACCAGCAGTGCAGGATGCCCAGAATGCTGTGAAGAGCATCAAAGAGCAGCATCTGGTG  
3297 E V R S M A N P P P M V K L A L E S I C L L L G E  
9976 GAGGTGAGGTCTATGGCCAACCCTCCTCCCATGGTCAAGTTGGCCCTGGAATCCATCTGTTTGTGTGCTGGGAGAA  
3322 A T S D W K T I K S I I M K D N F I G T V V N Y N  
10051 GCCACCTCCGATTGGAAGACCATCAAATCCATCATCATGAAGGATAATTTTCATTGGCACAGTTGTCAACTACAAC  
3347 T D D M P D D I R E K M R N K Y L S N P D Y N F E  
10126 ACAGATGACATGCCTGATGATATCCGTGAGAAGATGCGCAACAAGTATCTCAGCAACCCTGATTATAACTTTGAG  
3372 K V N R A S L A C G P M V K W A I A Q I E F A D M  
10201 AAGGTGAACCGTGCTTCACTGGCCTGTGGACCTATGGTCAAGTGGGCCATTGCTCAAATAGAATTTGCTGACATG  
3397 L K R V E P L R N E L S S L E H M A E E N K K K H  
10276 TTGAAGAGAGTGGAACCTCTGAGAAATGAACTGAGCAGTCTTGAACACATGGCCGAAGAGAACAAGAAGAAGCAT  
3422 E D V K G L I T R L E R S I A A Y K D E Y A L L I  
10351 GAAGATGTGAAGGGTCTCATTACACGTCTGGAACGTTCCATTGCTGCTTACAAAGATGAATATGCACTGCTCATA  
3447 S Q A Q A I K T D L E N V Q A K V D R S M A L I R  
10426 TCTCAGGCCAGGCCATCAAGACTGACCTGGAGAATGTGCAGGCCAAGGTGGACCGATCCATGGCCCTCATCAGG  
3472 N L S I E K D R W A A T S D T F K F Q M S T I I G  
10501 AACCTCAGCATCGAGAAGGACCGCTGGGCAGCCACCTCAGACACCTTCAAGTTCCAGATGTCCACCATCATTGGA  
3497 D V L L P S A F L A Y G G Y F D Q Q F R E N L F S  
10576 GATGTGCTACTTCCTTCTGCTTTCCCTAGCCTATGGTGGCTACTTTGACCAGCAGTTCAGAGAGAATCTGTTTCAGC  
3522 N W C H H L L Q A N L Q F R G D I A R T E Y L S N  
10651 AACTGGTGTCAACCATCTGCTGCAGGCCAACCTTCAATTCCGAGGAGACATTGCCCGCACTGAGTACCTGTCCAAC  
3547 P D E R L R W Q A N A L P A D E L C T E N A I R L  
10726 CCTGATGAAAGGCTGCGCTGGCAAGCAAATGCCCTTCCTGCTGACGAGCTCTGCACTGAGAATGCCATCAGGCTC  
3572 N R F N R Y P L I I D P S G Q A T E F I M N E F K  
10801 AACAGGTTCAACAGATACCCACTCATCATTGATCCCTCAGGCCAGGCCACAGAGTTCATCATGAATGAATTCAAA  
3597 D K K I T K T S F L D D S F R K N L E S A L R F G  
10876 GACAAGAAAATCACAAAGACCAGCTTCCTGGATGACTCTTTCAGAAAGAACCTTGAATCAGCCCTTAGGTTTGGC  
3622 N P L L V Q D V E N Y D P I L N P V L N R E L R R  
10951 AATCCACTGCTGGTACAAGATGTTGAGAATTACGATCCCATCCTGAACCCTGTGCTGAACCGTGAACGCGACGT  
3647 T G G R V L I T L G D Q D I D L S P A F T I F L S  
11026 ACTGGTGGTCGTGTTCTCATCACCTTGAGAGACCAGGACATTGATCTTTCTCCAGCTTTCACCATCTTCCTTCT  
3672 T R D P T V E F P P D I C S R V T F V N F T V T R  
11101 ACTCGTGACCCTACAGTAGAGTTCCACCAGACATCTGTTCCCGTGCTCACTTTTGTCAACTTCACAGTAACACGG  
3697 S S L Q S Q C L N Q V L K A E R P D I D D K R S N  
11176 TCATCTCTGCAGTCCCAGTGTCTTAACCAAGTCTCAAGGCTGAGCGGCCAGACATTGATGACAAGCGGTCCAAC  
3722 L L K L Q G E F Q L R L R Q L E K N L L Q V L S D  
11251 CTGCTCAAGCTTCAGGGTGAATTCCAGTTGCGTCTGAGACAGCTAGAGAAGAACCTGCTGCAAGTACTGAGTGAC  
3747 S K G Q I L D D D S V I T T L E T L K E E A A D I  
11326 TCCAAGGGGAGATCCTGGATGATGACTCCGTGATAACCACCCTTGAGACCTTGAAGGAGGAGGCGGCAGACATT  
3772 S L K V Q E T D K T M N E I E M V S Q Q Y L P L S  
11401 TCCCTCAAGGTGCAAGAGACTGACAAGACAATGAATGAGATTGAGATGGTGTACAGCAGTACTTGCCACTCTCA  
3797 L A C S S I Y F T L D S L N Q I H F L Y Q Y S L H  
11476 TTGGCCTGCTCCAGTATCTACTTCACACTCGACTCACTGAACCAGATCCACTTCTTATACCAGTATCTCTGCAC  
3822 F F L D V F T D V L S N N P N I R D H T D Y S R R

11551 TTCTTCTCTGGACGTGTTACCGATGTGCTCAGCAACAATCCCAACATCCGGGACCACACTGACTACTCTCGCCGC  
3847 L S I I T N D L F Q L T Y T R V A R G M L H T D R  
11626 CTGTCCATCATCACCAACGACCTCTTCCAGTTGACATATAACCAGAGTGGCCCAGGAATGCTGCACACGGACCGC  
3872 L V L A V L L A R I R L R G V T S E P S Y D T E F  
11701 CTGGTGCTGGCTGTTCTGCTTGCCCGCATCCGCCTGAGGGGAGTCACCTCAGAACCTTCTATGACACAGAGTTC  
3897 Q F L L K S K E G L L N T T V S A T A G L T P E Q  
11776 CAGTTCCTCCTGAAGAGCAAAGAAGGTCTTCTCAACACCACAGTCTCAGCCACGGCTGGTCTTACCCAGAGCAG  
3922 T D S M L R L C N K V P A F A N M D R L V G N K D  
11851 ACAGACTCCATGCTGAGGCTTTGTAACAAGGTACCAGCCTTTGCCAATATGGATCGCCTAGTGGGGAACAAAGAT  
3947 F Q A W L E S A A P E L N V P T I W E T E K Q L S  
11926 TTCCAGGCTTGGCTTGAGTCTGCCGCCCCAGAGCTGAATGTGCCAACCATCTGGGAGACAGAGAAGCAACTGTCA  
3972 P V G Q S M Y H I L A I Q A F R P D R L Y A A A G  
12001 CCAGTCGCCAGTCTATGTACCACATTCTGGCCATCCAGGCATTCCAGACCAGACAGATTGTATGCAGCTGCTGGG  
3997 L F V N N V L G D G F L G I G E R E V N L A S V V  
12076 CTGTTTGTTAACAATGTGTTGGGTGATGGCTTCTTGGGCATTGGTGAGCGGGAGGTGAACCTTGGCATCAGTGGTG  
4022 E G E V K A N T P V L M C A A Q G F D A S V R V D  
12151 GAGGGTGAAGTGAAGGCCAACACTCCAGTGCTCATGTGTGCTGCCAGGGCTTTGATGCCTCAGTCAGGGTTGAT  
4047 N L A A E L S K G M T S I A F G S A E G F S Q A E  
12226 AACTTGGCAGCAGAACTCAGCAAAGGAATGACCTCCATTGCCTTTGGCTCAGCAGAAGGTTTCAGCCAGGCTGAG  
4072 K A I N S A V K N G R W V M L K N V H L A P A W L  
12301 AAAGCCATCAACTCGGCCGTCAAGAATGGAAGGTGGGTGATGTTGAAGAATGTCCACCTGGCACCTGCCTGGTTG  
4097 V Q L E K K L H S L H P H P Q F R L F L T M E I T  
12376 GTCCAACTAGAGAAGAAGCTCCACTCCCTTCACCCACATCCACAATTCCGGCTCTTCCTCACCATGGAGATCACA  
4122 P R L P V N L L R A G R V F V F E P P P G V R A N  
12451 CCACGCTGCCTGTCAACCTCCTGCGTGCTGGCCGTGTGTTTGTGTTTGAGCCGCCACCAGGCGTCCGTGCCAAC  
4147 L L R T F S T V P A S R M M R S P N E R A R L Y F  
12526 CTGCTGCGAACTTTTCCAGCACGGTGCCGGCCTCAAGGATGATGCGGTGCGCCAATGAGCGTGCCCGCCTCTACTTC  
4172 L L A W F H A I T Q E R L R Y A P L G W A E Y Y E  
12601 CTGCTGGCTTGGTTCCACGCCATCACACAGGAACGGCTGCGTTACGCTCCACTTGGCTGGGCGGAGTACTATGAA  
4197 F N E S D L R V A C D T L D T W I G A T A M G R T  
12676 TTCAATGAGTCAGATCTGCGTGTGGCTGTGACACTCTCGACACCTGGATTGGAGCCACTGCTATGGGTGCAACA  
4222 N L P P E K V P W D A L A T L M S Q C I Y G G K I  
12751 AATCTGCCTCCAGAGAAAGTACCATGGGATGCCTTGGCCACCCTCATGTCCCAGTGCATTTATGGTGGCAAGATT  
4247 D D E F D Q R L L T S F L N K L F T P K S F D P E  
12826 GACGATGAATTTGACCAAAGGCTGCTCACTTCCTTCTCAACAAGCTGTTCACTCCCAAGAGCTTTGACCCCTGAG  
4272 F P L V C N V D G V E N Q N I T M P D G I R R D Q  
12901 TTCCCTCTGGTCTGCAATGTAGACGGTGTGAAAACCAGAACATCACCATGCCTGATGGAATCCGACGTGACCAG  
4297 F M Q W V E S L T D R Q T P S W L G L P N N A E K  
12976 TTCATGCAGTGGGTGGAGTCCCTCACTGATCGCCAGACTCCCAGTTGGCTTGGGCTGCCCAACAATGCTGAGAAG  
4322 V L L T T R G T D M L S K L M K M Q V L E G D E E  
13051 GTCCTGCTCACCACCAGGGGCACAGACATGTTGAGCAAACCTGATGAAAATGCAAGTTCTTGAGGGTGATGAGGAG  
4347 L A Y G G D G T P G T E R K D I E G R P S W M V T  
13126 CTGGCCTATGGCGGGATGGCACACCTGGCACAGAGCGGAAAGATATTGAGGGCCGTCCATCGTGGATGGTAACA  
4372 L H Q S A V T W L S H L P E S V A N L R R T M D N



13201 TTGCACCAGTCTGCTGTACCTGGCTTTACACCTGCCTGAGTCAGTGGCTAATCTGCGTCGTACAATGGACAAC  
 4397 I K D P L Y R Y F E R E V N S G A K L L R V V K S  
 13276 ATCAAGGATCCACTGTATCGTTACTTTGAACGGGAAGTGAACCTCTGGTGCTAAATTGTTGCGTGTGGTGAAGAGT  
 4422 D L N D V V L I C K A E K K Q T N Y H R N M V S Q  
 13351 GACCTCAATGATGTTGTCTCATCTGCAAGGCTGAGAAGAAACAGACAAATTACCACCGTAATATGGTGAGCCAG  
 4447 L V K G I I P D Q W K A Y T V P R G A T V I Q W I  
 13426 CTAGTGAAAGGCATCATTCTGACCAGTGGGAAGGCTTACACAGTGCCTCGTGAGCCACAGTCATCCAGTGGATC  
 4472 T D F S Q R V K Q L Q E I S Q Q V A Q F G A G E L  
 13501 ACAGACTTCTCCAGCGTGTCAAACAGCTGCAGGAGATTTACAGCAAGTGGCTCAGTTTGGAGCAGGAGAATTG  
 4497 K N V T V W L G G L F N P E A Y V T A T R Q C V A  
 13576 AAGAATGTAACGGTGTGGCTGGGAGGTCTGTTCAACCCGGAAGCCTACGTCACTGCAACACGGCAGTGTGTAGCC  
 4522 Q A N S W S L E E L M L E V S I A D A E G Q I T A  
 13651 CAGGCCAACTCTTGCTCCTTGGAGGAATAATGTTAGAAGTATCCATTGCTGATGCTGAGGGCCAGATCACTGCT  
 4547 A G G F S I K G L K L Q G A V C V S N A L Q L T H  
 13726 GCAGGTGGCTTTTCTATCAAGGGACTAAAGCTGCAGGGAGCAGTGTGTGTGAGTAATGCACTGCAGTTGACCCAT  
 4572 T I M T D L P M V T L H W V R R E P V D T N K I T  
 13801 ACCATCATGACTGACCTACCGATGGTAACGCTCCACTGGGTACGTCGGGAACCTGTTGATACTAACAAGATCACA  
 4597 L P V Y L N A T R T D I L F T I D L K I A A N E N  
 13876 TTGCCAGTGACCTCAATGCCACCCGCACAGACATCCTCTTCACAATCGACCTTAAAATTGCAGCAAATGAGAAT  
 4622 A H S F Y E R G V A L L A S I S L N \*  
 13951 GCACACAGTTTCTATGAGAGGGGTGTGGCACTTCTTGCTTCTATCAGTCTCAATTAaggatctgtaaagacacc  
 14026 acagacaagctttaagttattgacagtaccgttacaatthttgtcaagatcatcaatgatgtttggagtaattaag  
 14101 gctattttaagatatttatctttagtagtcaggctcttaataatatagaaggaaaatgttaattaataaaaagagcag  
 14176 tgattgaaaaacaataaaatacactataacataaaaaaaaaa

**Figure S1:** Nucleic acid sequence and translated protein sequence of *Pt-dhc*.

[illegible]

|                                    | (1531)                                             | 1531                                   | 1540        | 1550                          | 1560       | 1570     | 1580       | 1590   | 1600 | 1610  | 1620  | 1632     |
|------------------------------------|----------------------------------------------------|----------------------------------------|-------------|-------------------------------|------------|----------|------------|--------|------|-------|-------|----------|
| Portunus trituberculatus DHQ(1513) | WEELKLNRIINLFEDVWIDVQRHVVYLEGIESSSDIRALIPFVTSRSSIS | TEILNLMKRVKRSF                         | UMVDVLN     | QVQSRLEHRLADLLGKIQKALGYELERES |            |          |            |        |      |       |       |          |
| Drosophila melanogaster DHQ(1515)  | WEELKLNRIINLFEDVWIDVQRHVVYLEGIESSSDIRALIPFVTSRSSIS | TEILNLMKRVKRSF                         | UMVDVLN     | QVQSRLEHRLADLLGKIQKALGYELERES |            |          |            |        |      |       |       |          |
| Danio rerio DHQ(1523)              | WEELKLNRIINLFEDVWIDVQRHVVYLEGIESSSDIRALIPFVTSRSSIS | TEILNLMKRVKRSF                         | UMVDVLN     | QVQSRLEHRLADLLGKIQKALGYELERES |            |          |            |        |      |       |       |          |
| Mus musculus DHQ(1521)             | WEELKLNRIINLFEDVWIDVQRHVVYLEGIESSSDIRALIPFVTSRSSIS | TEILNLMKRVKRSF                         | UMVDVLN     | QVQSRLEHRLADLLGKIQKALGYELERES |            |          |            |        |      |       |       |          |
| Homo sapiens DHQ(1521)             | WEELKLNRIINLFEDVWIDVQRHVVYLEGIESSSDIRALIPFVTSRSSIS | TEILNLMKRVKRSF                         | UMVDVLN     | QVQSRLEHRLADLLGKIQKALGYELERES |            |          |            |        |      |       |       |          |
| Consensus(1531)                    | WEELKLNRIINLFEDVWIDVQRHVVYLEGIESSSDIRALIPFVTSRSSIS | TEILNLMKRVKRSF                         | UMVDVLN     | QVQSRLEHRLADLLGKIQKALGYELERES |            |          |            |        |      |       |       |          |
| Portunus trituberculatus DHQ(1633) | SPFRFFYVSGDELLLEIGNSKNVAKLCHKFKIMFGVSSIIINDEINSVLV | SSSEGEVMFKTFVSTIEHPKINELWILVEKEMVILAKL | LAESVTEV    |                               |            |          |            |        |      |       |       |          |
| Drosophila melanogaster DHQ(1615)  | SPFRFFYVSGDELLLEIGNSKNVAKLCHKFKIMFGVSSIIINDEINSVLV | SSSEGEVMFKTFVSTIEHPKINELWILVEKEMVILAKL | LAESVTEV    |                               |            |          |            |        |      |       |       |          |
| Danio rerio DHQ(1625)              | SPFRFFYVSGDELLLEIGNSKNVAKLCHKFKIMFGVSSIIINDEINSVLV | SSSEGEVMFKTFVSTIEHPKINELWILVEKEMVILAKL | LAESVTEV    |                               |            |          |            |        |      |       |       |          |
| Mus musculus DHQ(1623)             | SPFRFFYVSGDELLLEIGNSKNVAKLCHKFKIMFGVSSIIINDEINSVLV | SSSEGEVMFKTFVSTIEHPKINELWILVEKEMVILAKL | LAESVTEV    |                               |            |          |            |        |      |       |       |          |
| Homo sapiens DHQ(1625)             | SPFRFFYVSGDELLLEIGNSKNVAKLCHKFKIMFGVSSIIINDEINSVLV | SSSEGEVMFKTFVSTIEHPKINELWILVEKEMVILAKL | LAESVTEV    |                               |            |          |            |        |      |       |       |          |
| Consensus(1633)                    | SPFRFFYVSGDELLLEIGNSKNVAKLCHKFKIMFGVSSIIINDEINSVLV | SSSEGEVMFKTFVSTIEHPKINELWILVEKEMVILAKL | LAESVTEV    |                               |            |          |            |        |      |       |       |          |
| Portunus trituberculatus DHQ(1717) | FKHL--PITTEITAMCQYQACVYVLA--QTSRSRFFVAAL--VDSRFF   | QQTQVETATFATFATVQQT                    | IRAKTKPHITS | SPHKKTKITNT                   | IN         |          |            |        |      |       |       |          |
| Drosophila melanogaster DHQ(1717)  | FKHL--PITTEITAMCQYQACVYVLA--QTSRSRFFVAAL--VDSRFF   | QQTQVETATFATFATVQQT                    | IRAKTKPHITS | SPHKKTKITNT                   | IN         |          |            |        |      |       |       |          |
| Danio rerio DHQ(1727)              | FKHL--PITTEITAMCQYQACVYVLA--QTSRSRFFVAAL--VDSRFF   | QQTQVETATFATFATVQQT                    | IRAKTKPHITS | SPHKKTKITNT                   | IN         |          |            |        |      |       |       |          |
| Mus musculus DHQ(1725)             | FKHL--PITTEITAMCQYQACVYVLA--QTSRSRFFVAAL--VDSRFF   | QQTQVETATFATFATVQQT                    | IRAKTKPHITS | SPHKKTKITNT                   | IN         |          |            |        |      |       |       |          |
| Homo sapiens DHQ(1727)             | FKHL--PITTEITAMCQYQACVYVLA--QTSRSRFFVAAL--VDSRFF   | QQTQVETATFATFATVQQT                    | IRAKTKPHITS | SPHKKTKITNT                   | IN         |          |            |        |      |       |       |          |
| Consensus(1735)                    | FKHL--PITTEITAMCQYQACVYVLA--QTSRSRFFVAAL--VDSRFF   | QQTQVETATFATFATVQQT                    | IRAKTKPHITS | SPHKKTKITNT                   | IN         |          |            |        |      |       |       |          |
| Portunus trituberculatus DHQ(1819) | KIDVKSQSPFVSNRFFYDHDKTVDVQLDSMANARNGFEYLGWV        | LVGTFLTDLR                             | SYLTMQALER  | LSSGSPFGAGT                   | GKTESVKAL  | QNLGR    | FFVIV      |        |      |       |       |          |
| Drosophila melanogaster DHQ(1818)  | KIDVKSQSPFVSNRFFYDHDKTVDVQLDSMANARNGFEYLGWV        | LVGTFLTDLR                             | SYLTMQALER  | LSSGSPFGAGT                   | GKTESVKAL  | QNLGR    | FFVIV      |        |      |       |       |          |
| Danio rerio DHQ(1827)              | KIDVKSQSPFVSNRFFYDHDKTVDVQLDSMANARNGFEYLGWV        | LVGTFLTDLR                             | SYLTMQALER  | LSSGSPFGAGT                   | GKTESVKAL  | QNLGR    | FFVIV      |        |      |       |       |          |
| Mus musculus DHQ(1827)             | KIDVKSQSPFVSNRFFYDHDKTVDVQLDSMANARNGFEYLGWV        | LVGTFLTDLR                             | SYLTMQALER  | LSSGSPFGAGT                   | GKTESVKAL  | QNLGR    | FFVIV      |        |      |       |       |          |
| Homo sapiens DHQ(1829)             | KIDVKSQSPFVSNRFFYDHDKTVDVQLDSMANARNGFEYLGWV        | LVGTFLTDLR                             | SYLTMQALER  | LSSGSPFGAGT                   | GKTESVKAL  | QNLGR    | FFVIV      |        |      |       |       |          |
| Consensus(1837)                    | KIDVKSQSPFVSNRFFYDHDKTVDVQLDSMANARNGFEYLGWV        | LVGTFLTDLR                             | SYLTMQALER  | LSSGSPFGAGT                   | GKTESVKAL  | QNLGR    | FFVIV      |        |      |       |       |          |
| Portunus trituberculatus DHQ(1921) | NCDETFDQAMGRIFVGLQGVGAWGCFDEPNRLERMLSAV            | SSQVQICLALREHSPN                       | TS          | PIT                           | ELLNKLQVKS | FDMAIL   | ITMMPGYAGH | SNL    |      |       |       |          |
| Drosophila melanogaster DHQ(1920)  | NCDETFDQAMGRIFVGLQGVGAWGCFDEPNRLERMLSAV            | SSQVQICLALREHSPN                       | TS          | PIT                           | ELLNKLQVKS | FDMAIL   | ITMMPGYAGH | SNL    |      |       |       |          |
| Danio rerio DHQ(1931)              | NCDETFDQAMGRIFVGLQGVGAWGCFDEPNRLERMLSAV            | SSQVQICLALREHSPN                       | TS          | PIT                           | ELLNKLQVKS | FDMAIL   | ITMMPGYAGH | SNL    |      |       |       |          |
| Mus musculus DHQ(1929)             | NCDETFDQAMGRIFVGLQGVGAWGCFDEPNRLERMLSAV            | SSQVQICLALREHSPN                       | TS          | PIT                           | ELLNKLQVKS | FDMAIL   | ITMMPGYAGH | SNL    |      |       |       |          |
| Homo sapiens DHQ(1931)             | NCDETFDQAMGRIFVGLQGVGAWGCFDEPNRLERMLSAV            | SSQVQICLALREHSPN                       | TS          | PIT                           | ELLNKLQVKS | FDMAIL   | ITMMPGYAGH | SNL    |      |       |       |          |
| Consensus(1939)                    | NCDETFDQAMGRIFVGLQGVGAWGCFDEPNRLERMLSAV            | SSQVQICLALREHSPN                       | TS          | PIT                           | ELLNKLQVKS | FDMAIL   | ITMMPGYAGH | SNL    |      |       |       |          |
| Portunus trituberculatus DHQ(2023) | TKRTIIRSTAMTIPDQITARFIMV                           | SSQFSFATKLAKTIVLS                      | SKDTSK      | QNTQ                          | NSQ        | YDFG     | RATKSVL    | VACNVK | RTIC | IT    | LR    | SRFFAV   |
| Drosophila melanogaster DHQ(2017)  | TKRTIIRSTAMTIPDQITARFIMV                           | SSQFSFATKLAKTIVLS                      | SKDTSK      | QNTQ                          | NSQ        | YDFG     | RATKSVL    | VACNVK | RTIC | IT    | LR    | SRFFAV   |
| Danio rerio DHQ(2031)              | TKRTIIRSTAMTIPDQITARFIMV                           | SSQFSFATKLAKTIVLS                      | SKDTSK      | QNTQ                          | NSQ        | YDFG     | RATKSVL    | VACNVK | RTIC | IT    | LR    | SRFFAV   |
| Mus musculus DHQ(2030)             | TKRTIIRSTAMTIPDQITARFIMV                           | SSQFSFATKLAKTIVLS                      | SKDTSK      | QNTQ                          | NSQ        | YDFG     | RATKSVL    | VACNVK | RTIC | IT    | LR    | SRFFAV   |
| Homo sapiens DHQ(2032)             | TKRTIIRSTAMTIPDQITARFIMV                           | SSQFSFATKLAKTIVLS                      | SKDTSK      | QNTQ                          | NSQ        | YDFG     | RATKSVL    | VACNVK | RTIC | IT    | LR    | SRFFAV   |
| Consensus(2041)                    | TKRTIIRSTAMTIPDQITARFIMV                           | SSQFSFATKLAKTIVLS                      | SKDTSK      | QNTQ                          | NSQ        | YDFG     | RATKSVL    | VACNVK | RTIC | IT    | LR    | SRFFAV   |
| Portunus trituberculatus DHQ(2125) | RCQETITGSCVCTMVPKLVADPITLIFSLISLVF                 | HSVYMC                                 | YHMTAL      | RELKVK                        | QV         | YHVS     | SEVW       |        |      |       |       |          |
| Drosophila melanogaster DHQ(2119)  | RCQETITGSCVCTMVPKLVADPITLIFSLISLVF                 | HSVYMC                                 | YHMTAL      | RELKVK                        | QV         | YHVS     | SEVW       |        |      |       |       |          |
| Danio rerio DHQ(2132)              | RCQETITGSCVCTMVPKLVADPITLIFSLISLVF                 | HSVYMC                                 | YHMTAL      | RELKVK                        | QV         | YHVS     | SEVW       |        |      |       |       |          |
| Mus musculus DHQ(2131)             | RCQETITGSCVCTMVPKLVADPITLIFSLISLVF                 | HSVYMC                                 | YHMTAL      | RELKVK                        | QV         | YHVS     | SEVW       |        |      |       |       |          |
| Homo sapiens DHQ(2133)             | RCQETITGSCVCTMVPKLVADPITLIFSLISLVF                 | HSVYMC                                 | YHMTAL      | RELKVK                        | QV         | YHVS     | SEVW       |        |      |       |       |          |
| Consensus(2148)                    | RCQETITGSCVCTMVPKLVADPITLIFSLISLVF                 | HSVYMC                                 | YHMTAL      | RELKVK                        | QV         | YHVS     | SEVW       |        |      |       |       |          |
| Portunus trituberculatus DHQ(2218) | SSSGSKTAKVILKALREL                                 | EGVEGVAH                               | IDPKA       | SKCHLY                        | LD         | PDNTREWD | GLTFV      | LKRI   | IND  | VGSEL | KRON  | FDGVDVDP |
| Drosophila melanogaster DHQ(2225)  | SSSGSKTAKVILKALREL                                 | EGVEGVAH                               | IDPKA       | SKCHLY                        | LD         | PDNTREWD | GLTFV      | LKRI   | IND  | VGSEL | KRON  | FDGVDVDP |
| Danio rerio DHQ(2221)              | SSSGSKTAKVILKALREL                                 | EGVEGVAH                               | IDPKA       | SKCHLY                        | LD         | PDNTREWD | GLTFV      | LKRI   | IND  | VGSEL | KRON  | FDGVDVDP |
| Mus musculus DHQ(2224)             | SSSGSKTAKVILKALREL                                 | EGVEGVAH                               | IDPKA       | SKCHLY                        | LD         | PDNTREWD | GLTFV      | LKRI   | IND  | VGSEL | KRON  | FDGVDVDP |
| Homo sapiens DHQ(2226)             | SSSGSKTAKVILKALREL                                 | EGVEGVAH                               | IDPKA       | SKCHLY                        | LD         | PDNTREWD | GLTFV      | LKRI   | IND  | VGSEL | KRON  | FDGVDVDP |
| Consensus(2245)                    | SSSGSKTAKVILKALREL                                 | EGVEGVAH                               | IDPKA       | SKCHLY                        | LD         | PDNTREWD | GLTFV      | LKRI   | IND  | VGSEL | KRON  | FDGVDVDP |
| Portunus trituberculatus DHQ(2320) | PNRGRILSPFNVA                                      | IMEFVQCLL                              | YATLATV     | SGCGMWIS                      | EDVLST     | MIENNEL  | ARE        | RI     | FL   | DE    | GEDEA | QSR      |
| Drosophila melanogaster DHQ(2323)  | PNRGRILSPFNVA                                      | IMEFVQCLL                              | YATLATV     | SGCGMWIS                      | EDVLST     | MIENNEL  | ARE        | RI     | FL   | DE    | GEDEA | QSR      |
| Danio rerio DHQ(2327)              | PNRGRILSPFNVA                                      | IMEFVQCLL                              | YATLATV     | SGCGMWIS                      | EDVLST     | MIENNEL  | ARE        | RI     | FL   | DE    | GEDEA | QSR      |
| Mus musculus DHQ(2326)             | PNRGRILSPFNVA                                      | IMEFVQCLL                              | YATLATV     | SGCGMWIS                      | EDVLST     | MIENNEL  | ARE        | RI     | FL   | DE    | GEDEA | QSR      |
| Homo sapiens DHQ(2328)             | PNRGRILSPFNVA                                      | IMEFVQCLL                              | YATLATV     | SGCGMWIS                      | EDVLST     | MIENNEL  | ARE        | RI     | FL   | DE    | GEDEA | QSR      |
| Consensus(2347)                    | PNRGRILSPFNVA                                      | IMEFVQCLL                              | YATLATV     | SGCGMWIS                      | EDVLST     | MIENNEL  | ARE        | RI     | FL   | DE    | GEDEA | QSR      |
| Portunus trituberculatus DHQ(2421) | WPCVKELEYATN                                       | LEHINDE                                | IT          | HL                            | SSSE       | ILAL     | CAVEN      | IV     | YH   | NT    | HEFT  | IT       |
| Drosophila melanogaster DHQ(2424)  | WPCVKELEYATN                                       | LEHINDE                                | IT          | HL                            | SSSE       | ILAL     | CAVEN      | IV     | YH   | NT    | HEFT  | IT       |
| Danio rerio DHQ(2429)              | WPCVKELEYATN                                       | LEHINDE                                | IT          | HL                            | SSSE       | ILAL     | CAVEN      | IV     | YH   | NT    | HEFT  | IT       |
| Mus musculus DHQ(2428)             | WPCVKELEYATN                                       | LEHINDE                                | IT          | HL                            | SSSE       | ILAL     | CAVEN      | IV     | YH   | NT    | HEFT  | IT       |
| Homo sapiens DHQ(2430)             | WPCVKELEYATN                                       | LEHINDE                                | IT          | HL                            | SSSE       | ILAL     | CAVEN      | IV     | YH   | NT    | HEFT  | IT       |
| Consensus(2449)                    | WPCVKELEYATN                                       | LEHINDE                                | IT          | HL                            | SSSE       | ILAL     | CAVEN      | IV     | YH   | NT    | HEFT  | IT       |
| Portunus trituberculatus DHQ(2523) | NPIDIVEVEIT                                        | SGNSKRV                                | QV          | YHVS                          | SEVW       |          |            |        |      |       |       |          |
| Drosophila melanogaster DHQ(2526)  | NPIDIVEVEIT                                        | SGNSKRV                                | QV          | YHVS                          | SEVW       |          |            |        |      |       |       |          |
| Danio rerio DHQ(2531)              | NPIDIVEVEIT                                        | SGNSKRV                                | QV          | YHVS                          | SEVW       |          |            |        |      |       |       |          |
| Mus musculus DHQ(2530)             | NPIDIVEVEIT                                        | SGNSKRV                                | QV          | YHVS                          | SEVW       |          |            |        |      |       |       |          |
| Homo sapiens DHQ(2532)             | NPIDIVEVEIT                                        | SGNSKRV                                | QV          | YHVS                          | SEVW       |          |            |        |      |       |       |          |
| Consensus(2551)                    | NPIDIVEVEIT                                        | SGNSKRV                                | QV          | YHVS                          | SEVW       |          |            |        |      |       |       |          |
| Portunus trituberculatus DHQ(2628) | TEHDHYCEYKPT                                       | FNGL                                   | IP          | QV                            | YHVS       | SEVW     |            |        |      |       |       |          |
| Drosophila melanogaster DHQ(2625)  | TEHDHYCEYKPT                                       | FNGL                                   | IP          | QV                            | YHVS       | SEVW     |            |        |      |       |       |          |
| Danio rerio DHQ(2633)              | TEHDHYCEYKPT                                       | FNGL                                   | IP          | QV                            | YHVS       | SEVW     |            |        |      |       |       |          |
| Mus musculus DHQ(2632)             | TEHDHYCEYKPT                                       | FNGL                                   | IP          | QV                            | YHVS       | SEVW     |            |        |      |       |       |          |
| Homo sapiens DHQ(2634)             | TEHDHYCEYKPT                                       | FNGL                                   | IP          | QV                            | YHVS       | SEVW     |            |        |      |       |       |          |
| Consensus(2755)                    | TEHDHYCEYKPT                                       | FNGL                                   | IP          | QV                            | YHVS       | SEVW     |            |        |      |       |       |          |
| Portunus trituberculatus DHQ(2727) | VEYFGTSELE                                         | YTCYS                                  | RAML        | LS                            | PS         | YH       | YHVS       | SEVW   |      |       |       |          |
| Drosophila melanogaster DHQ(2730)  | VEYFGTSELE                                         | YTCYS                                  | RAML        | LS                            | PS         | YH       | YHVS       | SEVW   |      |       |       |          |
| Danio rerio DHQ(2735)              | VEYFGTSELE                                         | YTCYS                                  | RAML        | LS                            | PS         | YH       | YHVS       | SEVW   |      |       |       |          |
| Mus musculus DHQ(2734)             | VEYFGTSELE                                         | YTCYS                                  | RAML        | LS                            | PS         | YH       | YHVS       | SEVW   |      |       |       |          |
| Homo sapiens DHQ(2736)             | VEYFGTSELE                                         | YTCYS                                  | RAML        | LS                            | PS         | YH       | YHVS       | SEVW   |      |       |       |          |
| Consensus(2755)                    | VEYFGTSELE                                         | YTCYS                                  | RAML        | LS                            | PS         | YH       | YHVS       | SEVW   |      |       |       |          |
| Portunus trituberculatus DHQ(2829) | VILSRSEWEN                                         | IND                                    | VA          | IKH                           | FIND       | IKR      | SNL        | SKY    | YHVS | SEVW  |       |          |
| Drosophila melanogaster DHQ(2892)  | VILSRSEWEN                                         | IND                                    | VA          | IKH                           | FIND       | IKR      | SNL        | SKY    | YHVS | SEVW  |       |          |
| Danio rerio DHQ(2837)              | VILSRSEWEN                                         | IND                                    | VA          | IKH                           | FIND       | IKR      | SNL        | SKY    | YHVS | SEVW  |       |          |
| Mus musculus DHQ(2836)             | VILSRSEWEN                                         | IND                                    | VA          | IKH                           | FIND       | IKR      | SNL        | SKY    | YHVS | SEVW  |       |          |
| Homo sapiens DHQ(2838)             | VILSRSEWEN                                         | IND                                    | VA          | IKH                           | FIND       | IKR      | SNL        | SKY    | YHVS | SEVW  |       |          |
| Consensus(2857)                    | VILSRSEWEN                                         | IND                                    | VA          | IKH                           | FIND       | IKR      | SNL        | SKY    | YHVS | SEVW  |       |          |
| Portunus trituberculatus DHQ(2931) | SGAKTILSR                                          | FVAMN                                  | GL          | SV                            | QV         | YHVS     | SEVW       |        |      |       |       |          |
| Drosophila melanogaster DHQ(2934)  | SGAKTILSR                                          | FVAMN                                  | GL          | SV                            | QV         | YHVS     | SEVW       |        |      |       |       |          |
| Danio rerio DHQ(2939)              | SGAKTILSR                                          | FVAMN                                  | GL          | SV                            | QV         | YHVS     | SEVW       |        |      |       |       |          |
| Mus musculus DHQ(2938)             | SGAKTILSR                                          | FVAMN                                  | GL          | SV                            | QV         | YHVS     | SEVW       |        |      |       |       |          |
| Homo sapiens DHQ(2940)             | SGAKTILSR                                          | FVAMN                                  | GL          | SV                            | QV         | YHVS     | SEVW       |        |      |       |       |          |
| Consensus(2959)                    | SGAKTILSR                                          | FVAMN                                  | GL          | SV                            | QV         | YHVS     | SEVW       |        |      |       |       |          |



[illegible]

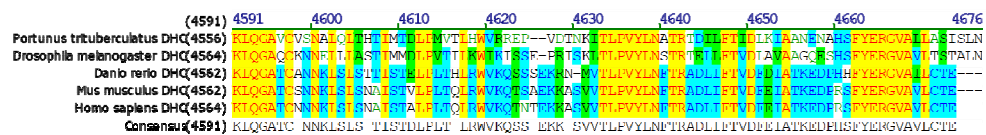

**Figure S2:** Multiple sequence alignment of protein sequences of *Pt-dhc*.
